# Supplementary material
Source: publisher site journal article supplement (https://www.degruyterbrill.com/publication/isbn/9783110299618/downloadAsset/9783110299618_Inhaltsverzeichnis.pdf)
Supplement: Supplementary file 1 [file 9783110299618_Inhaltsverzeichnis.pdf]

## Inhaltsverzeichnis

|                                                                                                     |    |
|-----------------------------------------------------------------------------------------------------|----|
| Einleitung .....                                                                                    | 1  |
| I. Moralische Einsicht und moralisches Handeln .....                                                | 11 |
| § 1 Der problemgeschichtliche Hintergrund der Frage der<br>moralischen Motivation .....             | 11 |
| 1. Die Antwort bei Sokrates/Platon und Aristoteles .....                                            | 11 |
| 2. Humes Antwort: Skeptizismus bezüglich praktischer<br>Vernunft .....                              | 16 |
| § 2 Der historische Kontext von Kants Fragestellung .....                                           | 25 |
| 1. Hutcheson über moralische Zustimmung und<br>moralisches Handeln .....                            | 25 |
| 2. Wolff und der ethische Rationalismus .....                                                       | 32 |
| 3. Kant zwischen Moral-Sense-Philosophie und ethischem<br>Rationalismus .....                       | 39 |
| § 3 Voraussetzungen einer Theorie der praktischen Vernunft:<br>Die Natur von Handlungsgründen ..... | 47 |
| 1. Aus Gründen handeln: Normative und motivierende<br>Gründe .....                                  | 47 |
| 2. Die Natur von Handlungsgründen: Interne und externe<br>Gründe .....                              | 56 |
| 3. Kant: Ein Ausblick .....                                                                         | 65 |
| II. Praktische Vernunft: Vernunft und Freiheit .....                                                | 68 |
| § 1 Freiheit als Spontaneität in der <i>Kritik der reinen Vernunft</i> .....                        | 68 |
| 1. Handlung und Kausalität .....                                                                    | 68 |
| 2. Das Freiheitsproblem .....                                                                       | 71 |
| 3. Der „intelligible Charakter“ als das „Zeichen“<br>menschlicher Freiheit .....                    | 74 |
| 4. Das Verhältnis von intelligiblem und empirischem<br>Charakter .....                              | 81 |
| 5. Die Vernunft als das Vermögen der Freiheit und der<br>Begriff des Sollens .....                  | 86 |

|                                                                                                                                                         |     |
|---------------------------------------------------------------------------------------------------------------------------------------------------------|-----|
| § 2 Begehren und Wollen: Menschliches Handeln zwischen Vernunft und Sinnlichkeit . . . . .                                                              | 99  |
| 1. Aus Gründen handeln . . . . .                                                                                                                        | 99  |
| 2. Begehrungsvermögen, menschliche und tierische Willkür . . . . .                                                                                      | 104 |
| 3. Praktische Sinnlichkeit: Begierde, Neigung, Interesse, Lust . . . . .                                                                                | 111 |
| III. Reine praktische Vernunft: Moralität und Autonomie . . . . .                                                                                       | 120 |
| § 1 Natürliche Autonomie . . . . .                                                                                                                      | 120 |
| 1. <i>Grundlegung</i> 412: „so ist der Wille nichts anders als praktische Vernunft“ . . . . .                                                           | 120 |
| 2. Subjektive und objektive Prinzipien des Handelns . . . . .                                                                                           | 129 |
| 3. Noch einmal: Handeln nach der Vorstellung von Gesetzen . . . . .                                                                                     | 135 |
| 4. Maximen . . . . .                                                                                                                                    | 140 |
| § 2 Moralität als Autonomie . . . . .                                                                                                                   | 146 |
| 1. Die Analyse des moralischen Werts und das Motiv der Pflicht ( <i>Grundlegung</i> I) . . . . .                                                        | 146 |
| 2. Die Rolle der Maxime im moralischen Handeln . . . . .                                                                                                | 156 |
| 3. Maximentest und „Achtung fürs Gesetz“ . . . . .                                                                                                      | 160 |
| 4. Moralität als Autonomie . . . . .                                                                                                                    | 168 |
| IV. Moralisches Urteil und moralische Triebfeder . . . . .                                                                                              | 188 |
| § 1 Die frühe Unterscheidung von „Dijudikation“ und „Exekution“ . . . . .                                                                               | 188 |
| 1. Kants „Ethik eines Suchenden“ in den 1760er Jahren . . . . .                                                                                         | 188 |
| 2. Die „moralphilosophische Umwälzung“ und die Unterscheidung zwischen „Dijudikationsprinzip“ und „Exekutionsprinzip“ in der Moralphilosophie . . . . . | 191 |
| 3. Kants frühe Antwort auf die ‚Motivationslücke‘ . . . . .                                                                                             | 196 |
| 4. Das Triebfedernproblem . . . . .                                                                                                                     | 200 |
| § 2 Das Triebfedernproblem in der weiteren Entwicklung von Kants Moralphilosophie . . . . .                                                             | 207 |
| 1. Der Begriff der Triebfeder in den Vorlesungen über Moralphilosophie der 1770er Jahre . . . . .                                                       | 207 |
| 2. „Achtung fürs Gesetz“ in der <i>Grundlegung</i> . . . . .                                                                                            | 214 |
| 3. Die Achtung als ‚vernunftgewirktes‘ Gefühl . . . . .                                                                                                 | 219 |
| 4. Moralisches Gefühl und moralisches Interesse . . . . .                                                                                               | 224 |

|                                                                                                                                                            |     |
|------------------------------------------------------------------------------------------------------------------------------------------------------------|-----|
| V. Praktische Gründe und Triebfedern: Die Entwicklung der Triebfedernfrage in Kants Moralphilosophie seit der <i>Kritik der praktischen Vernunft</i> ..... | 229 |
| § 1 Die Achtung als „einzige moralische Triebfeder“ in der <i>Kritik der praktischen Vernunft</i> .....                                                    | 229 |
| 1. Die Idee einer „Kritik der praktischen Vernunft“ und die These vom „Factum der Vernunft“ .....                                                          | 229 |
| 2. Der Ansatz im Triebfedern-Kapitel .....                                                                                                                 | 237 |
| 3. Die Argumentation im Triebfedern-Kapitel .....                                                                                                          | 241 |
| 4. Moralische Sensibilität und die Kräftermetaphorik ....                                                                                                  | 249 |
| 5. Die Analogie zum Erhabenen .....                                                                                                                        | 265 |
| § 2 Handlungsgründe und Motive .....                                                                                                                       | 270 |
| 1. Was ist die Triebfeder moralischen Handelns? .....                                                                                                      | 270 |
| 2. Reine praktische Vernunft? Die Bedeutung der Achtung als Triebfeder moralischen Handelns .....                                                          | 274 |
| 3. Das Gefühl der Achtung und der Begriff des moralischen Interesses .....                                                                                 | 281 |
| 4. Das Gefühl der Achtung als „Grund zu Maximen“ und die moralisch fragile Natur des Menschen .....                                                        | 288 |
| 5. Ist Kants Lehre von der Triebfeder moralischen Handelns intellektualistisch oder affektivistisch? .....                                                 | 294 |
| Schluss .....                                                                                                                                              | 302 |
| Literaturverzeichnis .....                                                                                                                                 | 308 |
| Personenregister .....                                                                                                                                     | 321 |
| Sachregister .....                                                                                                                                         | 325 |
